# Supplementary material for: Quality and Grain Yield Attributes of Rwandan Rice (Oryza sativaL.) Cultivars Grown in a Biotron Applying Two NPK Levels
Source: Hindawi journal article supplement (doi:10.1155/2018/5134569), 2018-06-24
Supplement: f1 [file 5134569.f1.docx]

**Supplementary data**

**Quality and grain yield attributes of Rwandan rice (*Oryza sativa L*.) cultivars grown in a biotron applying two NPK levels**

Table S1: Mean mineral content per cultivar and dose of fertilizer

| Cultivar | Dose of fertiliser | Al | B | Ba | Ca | Cu | Fe | K |
| --- | --- | --- | --- | --- | --- | --- | --- | --- |
| Ingwizabukungu  Ingwizabukungu | moderate  high | 12.25  11.57 | 6.66  6.08 | 1.34  0.49 | 789.48  934.97 | 13.83  10.36 | 18.85  18.18 | 4186.15  5462.29 |
| Intsindagirabigega  Intsindagirabigega | moderate  high | 11.79  * | 0.144  * | 0.48  * | 351.82  * | 5.90  * | 18.07  * | 3267.94  * |
| Jyambere  Jyambere | moderate  high | 12.57  12.32 | 2.84  3.44 | 3.72  0.69 | 836.11  2111.77 | 7.91  6.86 | 18.71  19.16 | 5271.59  8693.42 |
| Mpembuke  Mpembuke | moderate  high | 14.81 | 3.21  6.05 | 0.35  0.51 | 465.01  669.60 | 6.59 | 21.02  12.28 | 3653.13  4180.76 |
| 12.45 | 8.42 |
| Ndamirabahinzi  Ndamirabahinzi | moderate  high | 11.79 | 6.71  5.08 | 0.60  0.74 | 620.53  409.49 | 7.95 | 12.32  10.77 | 4208.95  5381.76 |
| 12.17 | 8.22 |
| Nemeyubutaka | moderate | 12.27 | 5.52 | 4.15 | 839.80 | 8.46 | 23.53 | 5371.22 |
| Nemeyubutaka | high | 16.42 | 3.21 | 0.76 | 1157.25 | 11.21 | 17.04 | 6031.06 |
| Zong geng  Zong geng | moderate  high | 12.86 | 0.99  * | 1.04  * | 650.41  * | 7.65 | 16.79  * | 4258.96  * |
| * | * |
| Cultivar | Dose of fertiliser | Mn | Mo | Na | P | S | Zn | Mg |
| Ingwizabukungu  Ingwizabukungu | moderate  high | 50.73  51.05 | 2.41  1.91 | 26.51  47.93 | 4607.59  5253.17 | 1584.09  1723.65 | 43.48  47.55 | 1793.09  1814.69 |
| Intsindagirabigega  Intsindagirabigega | moderate  high | 14.96  * | 0.49  * | 17.43  * | 2938.53  * | 1160.69  * | 36.96  * | 1074.89  * |
| Jyambere  Jyambere | moderate  high | 6.86  37.60 | 0.81  0.52 | 14.77  67.37 | 4219.12  5957.78 | 1460.24  2490.24 | 32.25  44.20 | 1740.37  1887.06 |
| Mpembuke  Mpembuke  Ndamirabahinzi  Ndamirabahinzi  Nemeyubutaka  Nemeyubutaka  Zong geng  Zong geng | moderate  high  moderate  high  moderate  high  moderate  high | 21.63  12.62  10.38  16.80  77.89  72.53  23.95  * | 0.00  1.51  1.45  1.04  0.86  1.50  1.54  * | 17.51  37.64  39.64  49.36  32.42  39.79  19.60  * | 3708.16  3924.54  3847.70  4025.83  4875.93  5189.79  3409.77  * | 1138.55  1306.98  1386.67  1370.86  1428.56  1634.05  1041.16  * | 29.41  31.74  33.96  31.72  41.49  40.81  32.27  * | 344.87  1361.33  1322.13  1366.76  2021.21  1808.12  1338.87  * |

*: mean data only for moderate fertilizer dose

Table S2: Mean heavy metal content per cultivar and dose of fertilizer

| Cultivar | dose | As | Cd | Co | Cr | Ni | Pb | Se |
| --- | --- | --- | --- | --- | --- | --- | --- | --- |
| Ingwizabukungu  Ingwizabukungu | Moderate  High | 0.058  0.067 | 0.134  0.118 | 0.034  0.031 | 0.779  0.364 | 2.337  1.226 | 0.141  0.178 | 0.029  0.020 |
| Intsindagirabigega  Intsindagirabigega | Moderate  High | 0.079  * | 0.050  * | 0.012  * | 0.379  * | 2.060  * | 0.083  * | 0.018  * |
| Jyambere  Jyambere | Moderate  High | 0.107  0.101 | 0.101  0.237 | 0.018  0.018 | 0.306  0.377 | 2.137  1.297 | 0.060  0.253 | 0.021  0.022 |
| Mpembuke  Mpembuke | Moderate  High | 0.045  0.054 | 0.036  0.030 | 0.017  0.028 | 0.273  0.150 | 1.334 | 0.050  0.090 | 0.019  0.022 |
| 1.436 |
| Ndamirabahinzi  Ndamirabahinzi | Moderate  High | 0.045  0.043 | 0.026  0.078 | 0.011  0.015 | 0.184  0.401 | 1.664 | 0.110  0.073 | 0.023  0.023 |
| 1.660 |
| Nemeyubutaka  Nemeyubutaka | Moderate  High | 0.096  0.055 | 0.082  0.157 | 0.024  0.021 | 0.458  0.317 | 1.612 | 0.065  0.174 | 0.022  0.018 |
| 0.821 |
| Zong geng | Moderate | 0.107 | 0.025 | 0.012 | 0.235 | 1.102 | 0.063 | 0.020 |
| Zong geng | High | * | * | * | * | * | * | * |

*: mean data only for moderate fertilizer dose

Table S3: Mean total phenolic content and total antioxidant capacity per cultivar and dose of fertilizer

| Cultivar | Dose of fertiliser | TPC  (GAE.100g-1 DW) | TAC  (µmol Fe2+ g-1 DW) |
| --- | --- | --- | --- |
| Ingwizabukungu | Moderate | 166.064 | 0.04 |
| Ingwizabukungu | High | 191.055 | 0.04 |
| Intsindagirabigega | Moderate | 223.104 | 0.11 |
| Intsindagirabigega | High | * | * |
| Jyambere | Moderate | 162.493 | 0.04 |
| Jyambere | High | 236.839 |  |
| Mpembuke | Moderate | 390.624 | 0.80 |
| Mpembuke | High | 320.735 | 0.43 |
| Ndamirabahinzi | Moderate | 542.776 | 1.00 |
| Ndamirabahinzi | High | 669.745 | 1.12 |
| Nemeyubutaka | Moderate | 162.493 | 0.12 |
| Nemeyubutaka | High | 164.596 | 0.21 |
| Zong geng | Moderate | 241.398 | 0.25 |
| Zong geng | High | * | * |

*: mean data only for moderate fertilizer dose

Table S4: Amount and size distribution of polymeric and monomeric protein in Rwandan rice cultivars

| Cultivar | Dose of fertilizer | Polymeric protein (%) | Solubility (%) | %UPP | % total extractable proteins | | | | |
| --- | --- | --- | --- | --- | --- | --- | --- | --- | --- |
| Peak1 | Peak2 | Peak3 | Peak4 | Peak5 |
| Ingwizabukungu | Moderate | 9.60 | 45.67 | 61.50 | 10.09 | 16.87 | 16.83 | 26.60 | 29.60 |
| Ingwizabukungu | High | 4.14 | 68.56 | 68.56 | 15.67 | 15.67 | 16.79 | 29.21 | 34.17 |
| Intsindagirabigega | Moderate | 4.90 | 56.50 | 57.90 | 4.80 | 24.70 | 20.80 | 26.20 | 23.50 |
| Intsindagirabigega | High | * | * | * | * | * | * | * | * |
| Jyambere | Moderate | 3.45 | 60.23 | 70.98 | 3.79 | 24.14 | 20.67 | 25.46 | 25.94 |
| Jyambere | High | 2.50 | 63.89 | 65.30 | 2.93 | 20.48 | 16.68 | 26.75 | 33.15 |
| Mpembuke | Moderate | 2.98 | 67.05 | 41.36 | 4.12 | 22.04 | 21.80 | 21.66 | 30.28 |
| Mpembuke | High | 3.45 | 61.53 | 46.27 | 3.92 | 25.19 | 23.63 | 25.28 | 21.98 |
| Ndamirabahinzi | Moderate | 5.36 | 52.25 | 70.91 | 5.51 | 15.71 | 17.56 | 35.18 | 37.41 |
| Ndamirabahinzi | High | 3.19 | 61.40 | 70.62 | 3.47 | 17.37 | 17.03 | 19.70 | 30.62 |
| Nemeyubutaka | Moderate | 4.87 | 52.83 | 68.70 | 4.88 | 19.78 | 17.93 | 19.96 | 32.72 |
| Nemeyubutaka | High | 3.56 | 54.73 | 66.55 | 3.62 | 21.47 | 18.20 | 19.31 | 32.61 |
| Zong geng | Moderate | 4.90 | 57.30 | 61.60 | 4.80 | 16.50 | 15.40 | 19.30 | 44.00 |
| Zong geng | High | * | * | * | * | * | * | * | * |

*: mean data only for moderate fertilizer dose

Table S5: Yield and yield component variation between rice cultivars and fertilizer doses

| Cultivar | Dose of fertiliser | Plant height  (cm) | Total tillers/  plant | Fertile tillers | Spike length | Spikelets  /spike | Grain yield  /plant (g) |
| --- | --- | --- | --- | --- | --- | --- | --- |
| Ingwizabukungu | Moderate | 104.7 | 4.33 | 2.66 | 19.81 | 9.36 | 6.53 |
| Ingwizabukungu | High | 111.0 | 3.00 | 2.00 | 19.03 | 6.72 | 4.96 |
| Intsindagirabigega | Moderate | 117.3 | 4.00 | 3.33 | 24.78 | 11.28 | 14.06 |
| Intsindagirabigega | High | 124.0 | 4.66 | * | * | * | 0.00 |
| Jyambere | Moderate | 119.3 | 4.33 | 4.33 | 28.33 | 14.43 | 17.43 |
| Jyambere | High | 122.3 | 5.66 | 2.66 | 27.50 | 11.83 | 12.33 |
| Mpembuke | Moderate | 133.3 | 3.66 | 3.33 | 19.33 | 8.22 | 6.80 |
| Mpembuke | High | 129.3 | 4.33 | 2.33 | 22.39 | 6.89 | 5.53 |
| Ndamirabahinzi | Moderate | 130.7 | 5.00 | 3.66 | 28.00 | 11.22 | 9.30 |
| Ndamirabahinzi | High | 134.3 | 5.33 | 2.33 | 28.89 | 9.00 | 5.60 |
| Nemeyubutaka | Moderate | 119.3 | 3.00 | 3.00 | 22.93 | 9.33 | 11.06 |
| Nemeyubutaka | High | 125.3 | 4.33 | 2.00 | 21.43 | 8.05 | 12.50 |
| Zong geng | Moderate | 138.7 | 3.00 | 2.00 | 20.00 | 13.00 | 12.70 |
| Zong geng | High | 139.0 | 3.66 | * | * | * | 0.00 |

*: mean data only for moderate fertilizer dose
